# Supplementary material
Source: PubMed Central journal article supplement (PMC7054843)
Supplement: jama-323-834-s001.pdf [file jama-323-834-s001.pdf]

## Supplementary Online Content

Ledley FD, McCoy SS, Vaughan G, Cleary EG. Profitability of large pharmaceutical companies compared with other large public companies [published March 3, 2020]. *JAMA*. doi:10.1001/jama.2020.0442

### **eAppendix.** Definitions of accounting and finance terms

**eTable 1.** Companies included in datasets with identifying information. Panel A: Companies in pharmaceutical dataset. Panel B: Companies in the S&P 500 dataset. Panel C: Companies in the healthcare dataset.

**eTable 2.** Summary statistics on pharmaceutical and S&P 500 datasets, 2000-2018

**eTable 3.** Median and IQR of profit margins for pharmaceutical companies and other sectors of the S&P 500, 2000–2018.

**eTable 4.** Median profit margins of selected large technology companies, 2000-2018

**eTable 5.** Median and IQR of profit margins for pharmaceutical companies and subsectors of the healthcare dataset, 2000–2018.

**eTable 6.** Median and IQR difference between profit margins of pharmaceutical companies and subsectors of the healthcare dataset, 2000–2018.

**eTable 7.** Differential profit margins of pharmaceutical and S&P 500 companies, complete results

**eTable 8.** Differential profit margins of pharmaceutical companies and sectors within the S&P 500, complete results

**eFigure 1A-F.** Distribution of expense and profit metrics as a fraction of revenue in the pharmaceutical and S&P 500 datasets

### **eReferences**

This supplementary material has been provided by the authors to give readers additional information about their work.

## eAppendix. Definitions of accounting and finance terms

### Revenue – Compustat variable: REVT

Revenue, also called sales or gross sales, is the amount of actual billings to customers for regular sales, reduced by cash discounts, trade discounts, and returned sales and allowances for which credit is given to customers. In the case of a pharmaceutical company, revenue from the drug sales does not reflect the list price of the drug or the price paid by patients, but rather the price paid by intermediaries including government, Pharmacy Benefit Managers, or health service providers to the pharmaceutical company, net of any discounts or rebates.

### Market capitalization – Calculated variable: CSHO x PRCC\_F (Common shares outstanding x Closing price at fiscal year end)

Market capitalization is the total market value of a company's outstanding shares, calculated as the number of common shares outstanding multiplied by the company's stock price. Market capitalization is a proxy for company size.

### Cost of Goods Sold (COGS) – Compustat variable: COGS, equivalent to REVT – GP (Revenue minus gross profit)

COGS represents all costs associated with manufacturing or purchasing the products that are sold during the year. For pharmaceutical companies, COGS will include all manufacturing costs for the product sold (i.e., the drug) during the year, which typically include the costs of raw materials, manufacturing, formulating, and packaging the drug product, labor costs associated with production and distribution, and the cost of Quality Control, Quality Assessment and FDA compliance as well as the allocated overhead costs associated with operating production facilities, personnel, and related services.

### Research & Development Expense (R&D) – Calculated variable: XRD + RDIP (R&D Expense + In-process R&D)

FASB accounting standards define research as “*planned search or critical investigation aimed at discovery of new knowledge with the hope that such knowledge will be useful in developing a new product or service, or a new process or technique, or in bringing about a significant improvement to an existing product or process.*”<sup>1</sup>

FASB accounting standards define development is defined as “*the translation of research findings or other knowledge into a plan or design for a new product or process or for a significant improvement to an existing product or process.*”<sup>1</sup>

According to these standards, R&D expense may include the cost of materials used in R&D activities, the cost or depreciation of equipment and facilities used in R&D, personnel costs for those engaged in R&D, contracts and services for R&D, the cost or amortization of acquired assets including intellectual property, and associated indirect cost.<sup>2</sup> R&D expense includes not only basic research, but applied and translational research, process development, and pilot production, and research required for regulatory approval,<sup>3</sup> but specifically excludes the costs associated with commercial production or quality control, ongoing improvements of existing products, marketing research, and costs associated with patent applications or litigation.<sup>4</sup>

In-process research and development (RDIP) represents the portion of the cost of a corporate acquisition that is considered to be the R&D “purchased” through the transaction. Prior to 2008, companies were allowed to immediately expense RDIP at the time of the acquisition. Following SFAS 141R in 2008, companies were generally required to capitalize RDIP costs, and these costs were amortized, rather than immediately expensed.<sup>5</sup> In this analysis, RDIP is not included with R&D to more closely reflect R&D costs and enable comparison of R&D expense before and after SFAS 141R.

Technical note: Compustat includes R&D expense and in-process R&D in the variable XRD. RDIP is coded as a negative number in Compustat. Therefore, to get R&D Expense without in-process R&D, RDIP is added to XRD.

### Selling, General & Administrative Expense (SG&A) – Calculated variable: XSGA-XRD

SG&A includes expenses incurred by the company in generating revenues (e.g., marketing, advertising, delivery) or in operations that are not directly related to the production of the good or service. SG&A represents the cost of corporate operations such as marketing and sales, human resources, facilities (not part of manufacturing), and management. We note that companies are not required to separate the costs of marketing and sales from other SG&A expense in their 10-k filings.

Technical note: The Compustat variable XSGA includes R&D expenses in most cases. To avoid double counting R&D expense, we subtract R&D expense from XSGA.

**Gross profit – Compustat variable: GP, equivalent to REVT – COGS**

**Gross profit margin – Gross Profit scaled by revenues =  $GP / REVT = (REVT - COGS) / REVT$**

Gross profit reflects the difference between revenue and COGS before any deduction of the other costs of running a company such as R&D or SG&A. Gross profit margin reflects gross profit scaled by total revenues. This measure varies widely by industry sector, and reflects the nature of the product being sold.

Gross Profit = Revenues – COGS

**Earnings before Interest Tax Depreciation and Amortization (EBITDA) - Compustat variable: EBITDA, equivalent to REVT – COGS – XSGA**

**EBITDA margin – EBITDA scaled by revenues =  $EBITDA / REVT$**

EBITDA reflects the company's pre-tax profits from core operations, before considering items such as the depreciation of capital assets, amortization of intangible assets, tax expense, and interest expense. EBITDA is a proxy for operating earnings. EBITDA margin reflects EBITDA scaled by total revenues. It is a measure of a company's operating margin.

$EBITDA = \text{Gross profit} - \text{SG\&A} - \text{R\&D} +/- \text{Miscellaneous Items}^* = \text{Revenues} - \text{COGS} - \text{SG\&A} - \text{R\&D} +/- \text{Miscellaneous Items}^*$

\*Miscellaneous Items include other revenues, expenses (other than Interest Expense, Tax Expense, Depreciation Expense, and Amortization Expense).

**Net income – Compustat variable: NI**

**Net income margin – Net income scaled by revenues =  $NI / REVT$**

Net income, often referred to as the “bottom line” or earnings, represents the income or loss reported by a company after all expenses have been subtracted from all revenues. This number is used in calculating a company's “earnings per share,” which is the most often-quoted measure of a company's profitability. Net income margin reflects Net income scaled by total revenues.

$\text{Net Income} = \text{EBITDA} - \text{Interest Expense} - \text{Tax Expense} - \text{Depreciation Expense} - \text{Amortization Expense}$ . This is equivalent to  $\text{Revenues} - \text{COGS} - \text{SG\&A} - \text{R\&D} +/- \text{Miscellaneous Items}^* - \text{Interest Expense} - \text{Tax Expense} - \text{Depreciation Expense} - \text{Amortization Expense}$

\*Miscellaneous Items include other revenues, expenses (other than Interest Expense, Tax Expense, Depreciation Expense, and Amortization Expense).

**eTable 1. Companies included in datasets with identifying information****Panel A: Pharmaceutical dataset**

| #  | Ticker | Company Name                       | NAICS Code | SIC Code | Sector      |
|----|--------|------------------------------------|------------|----------|-------------|
| 1  | ABT    | Abbott Laboratories                | 325412     | 2834     | Health Care |
| 2  | ABBV   | AbbVie Inc                         | 325414     | 2836     | Health Care |
| 3  | ALXN   | Alexion Pharmaceuticals Inc        | 325414     | 2836     | Health Care |
| 4  | AGN    | Allergan PLC                       | 325412     | 2834     | Health Care |
| 5  | AMGN   | Amgen Inc                          | 325414     | 2836     | Health Care |
| 6  | AZN    | Astrazeneca PLC                    | 325412     | 2834     | Health Care |
| 7  | BHC    | Bausch Health Cos Inc              | 325412     | 2834     | Health Care |
| 8  | BAX    | Baxter International Inc           | 325412     | 2834     | Health Care |
| 9  | BAYRY  | Bayer AG                           | 325        | 2800     | Health Care |
| 10 | BIIB   | Biogen Inc                         | 325414     | 2836     | Health Care |
| 11 | BMRN   | Biomarin Pharmaceutical Inc        | 325414     | 2836     | Health Care |
| 12 | BMJ    | Bristol-Myers Squibb Co            | 325412     | 2834     | Health Care |
| 13 | CELG   | Celgene Corp                       | 325412     | 2834     | Health Care |
| 14 | ESALY  | Eisai Co Ltd                       | 325412     | 2834     | Health Care |
| 15 | LLY    | Eli Lilly and Co                   | 325412     | 2834     | Health Care |
| 16 | ENDP   | Endo International plc             | 325412     | 2834     | Health Care |
| 17 | FMS    | Fresenius Medical Care AG &Co KGAA | 621492     | 8090     | Health Care |
| 18 | GILD   | Gilead Sciences Inc                | 325414     | 2836     | Health Care |
| 19 | GSK    | Glaxosmithkline PLC                | 325412     | 2834     | Health Care |
| 20 | INCY   | Incyte Corp                        | 325414     | 2836     | Health Care |
| 21 | JNJ    | Johnson & Johnson                  | 325412     | 2834     | Health Care |
| 22 | MNK    | Mallinckrodt Plc                   | 325412     | 2834     | Health Care |

| #  | Ticker | Company Name                       | NAICS Code | SIC Code | Sector      |
|----|--------|------------------------------------|------------|----------|-------------|
| 23 | MRK    | Merck & Co Inc.                    | 325412     | 2834     | Health Care |
| 24 | MYL    | Mylan NV                           | 325412     | 2834     | Health Care |
| 25 | NKTR   | Nektar Therapeutics                | 325412     | 2834     | Health Care |
| 26 | NVS    | Novartis AG                        | 325412     | 2834     | Health Care |
| 27 | NVO    | Novo Nordisk A/S                   | 325412     | 2834     | Health Care |
| 28 | PFE    | Pfizer Inc                         | 325412     | 2834     | Health Care |
| 29 | REGN   | Regeneron Pharmaceuticals Inc      | 325412     | 2834     | Health Care |
| 30 | RHHBY  | Roche Holding AG                   | 325412     | 2834     | Health Care |
| 31 | SNY    | Sanofi                             | 325412     | 2834     | Health Care |
| 32 | SHPG   | Shire PLC                          | 325414     | 2836     | Health Care |
| 33 | TEVA   | Teva Pharmaceutical Industries Ltd | 325412     | 2834     | Health Care |
| 34 | UTHR   | United Therapeutics Corp           | 325412     | 2834     | Health Care |
| 35 | VRTX   | Vertex Pharmaceuticals Inc         | 325412     | 2834     | Health Care |

**Panel B: S&P 500 Dataset**

| # | Ticker | Company Name               | NAICS Code | SIC Code | Sector                 |
|---|--------|----------------------------|------------|----------|------------------------|
| 1 | MMM    | 3M Co                      | 322220     | 2670     | Materials              |
| 2 | AOS    | A. O. Smith Corp           | 335220     | 3630     | Industrials            |
| 3 | ACN    | Accenture PLC              | 541611     | 8742     | Technology             |
| 4 | ATVI   | Activision Blizzard Inc    | 511210     | 7372     | Technology             |
| 5 | ADBE   | Adobe Inc                  | 511210     | 7372     | Technology             |
| 6 | AAP    | Advance Auto Parts Inc.    | 441310     | 5531     | Consumer Discretionary |
| 7 | AMD    | Advanced Micro Devices Inc | 334413     | 3674     | Technology             |
| 8 | AES    | AES Corporation (The)      | 22111      | 4991     | Utilities              |

| #  | Ticker | Company Name                     | NAICS Code | SIC Code | Sector                 |
|----|--------|----------------------------------|------------|----------|------------------------|
| 9  | AET    | Aetna Inc.                       | 524114     | 6324     | Health Care            |
| 10 | A      | Agilent Technologies Inc         | 334516     | 3826     | Health Care            |
| 11 | APD    | Air Products and Chemicals Inc.  | 325120     | 2810     | Materials              |
| 12 | AKAM   | Akamai Technologies Inc          | 519130     | 7370     | Technology             |
| 13 | ALK    | Alaska Air Group Inc.            | 481111     | 4512     | Consumer Discretionary |
| 14 | ALB    | Albemarle Corp                   | 325180     | 2810     | Materials              |
| 15 | ALLE   | Allegion Plc                     | 332510     | 3420     | Industrials            |
| 16 | LNT    | Alliant Energy Corp              | 22111      | 4931     | Utilities              |
| 17 | GOOGL  | Alphabet Inc                     | 519130     | 7370     | Communications         |
| 18 | MO     | Altria Group Inc                 | 312230     | 2111     | Consumer Staples       |
| 19 | AMZN   | Amazon.com Inc                   | 454110     | 5961     | Consumer Discretionary |
| 20 | AEE    | Ameren Corp                      | 2211       | 4931     | Utilities              |
| 21 | AAL    | American Airlines Group Inc      | 481111     | 4512     | Consumer Discretionary |
| 22 | AEP    | American Electric Power Co Inc   | 2211       | 4911     | Utilities              |
| 23 | AWK    | American Water Works Company Inc | 221310     | 4941     | Utilities              |
| 24 | AME    | AMETEK Inc                       | 334513     | 3823     | Industrials            |
| 25 | APH    | Amphenol Corp                    | 334417     | 3678     | Industrials            |
| 26 | APC    | Anadarko Petroleum Corp          | 2111       | 1311     | Energy                 |
| 27 | ADI    | Analog Devices Inc.              | 334413     | 3674     | Technology             |
| 28 | ANSS   | ANSYS Inc                        | 511210     | 7372     | Technology             |
| 29 | ANTM   | Anthem Inc                       | 524114     | 6324     | Health Care            |
| 30 | APA    | Apache Corp                      | 2111       | 1311     | Energy                 |
| 31 | AAPL   | Apple Inc                        | 334220     | 3663     | Technology             |
| 32 | AMAT   | Applied Materials Inc.           | 333242     | 3559     | Technology             |

| #  | Ticker | Company Name                       | NAICS Code | SIC Code | Sector                 |
|----|--------|------------------------------------|------------|----------|------------------------|
| 33 | APTV   | Aptiv Plc                          | 336320     | 3714     | Consumer Discretionary |
| 34 | ADM    | Archer-Daniels-Midland Co          | 31122      | 2070     | Consumer Staples       |
| 35 | ARNC   | Arconic Inc                        | 336413     | 3728     | Industrials            |
| 36 | ANET   | Arista Networks Inc                | 334118     | 3576     | Technology             |
| 37 | T      | AT&T Inc                           | 517312     | 4812     | Communications         |
| 38 | ADSK   | Autodesk Inc.                      | 519130     | 7370     | Technology             |
| 39 | ADP    | Automatic Data Processing Inc.     | 518210     | 7374     | Technology             |
| 40 | AZO    | AutoZone Inc                       | 441310     | 5531     | Consumer Discretionary |
| 41 | AVY    | Avery Dennison Corp                | 322220     | 2670     | Materials              |
| 42 | BHGE   | Baker Hughes a GE Co               | 213112     | 1389     | Energy                 |
| 43 | BLL    | Ball Corp                          | 332431     | 3411     | Materials              |
| 44 | BBY    | Best Buy Co Inc                    | 443142     | 5731     | Consumer Discretionary |
| 45 | HRB    | Block H&R Inc                      | 541213     | 7200     | Consumer Discretionary |
| 46 | BA     | Boeing Co                          | 336411     | 3721     | Industrials            |
| 47 | BKNG   | Booking Holdings Inc               | 519130     | 7370     | Communications         |
| 48 | BWA    | BorgWarner Inc                     | 336310     | 3714     | Consumer Discretionary |
| 49 | AVGO   | Broadcom Inc                       | 334413     | 3674     | Technology             |
| 50 | BR     | Broadridge Financial Solutions Inc | 541512     | 7373     | Technology             |
| 51 | BF.B   | BROWN FORMAN CORP                  | 312140     | 2085     | Consumer Staples       |
| 52 | CHRW   | C.H. Robinson Worldwide Inc.       | 484121     | 4213     | Industrials            |
| 53 | CA     | CA Inc                             | 511210     | 7372     | Technology             |
| 54 | COG    | Cabot Oil & Gas Corp               | 2111       | 1311     | Energy                 |
| 55 | CDNS   | Cadence Design Systems Inc         | 511210     | 7372     | Technology             |
| 56 | CPB    | Campbell Soup Co                   | 311422     | 2030     | Consumer Staples       |

| #  | Ticker | Company Name                        | NAICS Code | SIC Code | Sector                 |
|----|--------|-------------------------------------|------------|----------|------------------------|
| 57 | CPRI   | CAPRI HOLDINGS LTD                  | 315        | 2300     | Consumer Discretionary |
| 58 | KMX    | CarMax Inc                          | 441120     | 5500     | Consumer Discretionary |
| 59 | CCL    | Carnival Corp                       | 483112     | 4400     | Consumer Discretionary |
| 60 | CAT    | Caterpillar Inc                     | 333120     | 3531     | Industrials            |
| 61 | CBRE   | CBRE Group Inc                      | 531        | 6500     | Financials             |
| 62 | CBS    | CBS Corp                            | 515120     | 4888     | Communications         |
| 63 | CNC    | Centene Corp                        | 524114     | 6324     | Health Care            |
| 64 | CNP    | CenterPoint Energy Inc.             | 22111      | 4931     | Utilities              |
| 65 | CTL    | CenturyLink Inc                     | 517311     | 4813     | Communications         |
| 66 | CERN   | Cerner Corp                         | 541512     | 7373     | Technology             |
| 67 | CF     | CF Industries Holdings Inc          | 325311     | 2870     | Materials              |
| 68 | CHTR   | Charter Communications Inc          | 515210     | 4841     | Communications         |
| 69 | CVX    | Chevron Corp                        | 324110     | 2911     | Energy                 |
| 70 | CMG    | Chipotle Mexican Grill Inc          | 722513     | 5812     | Consumer Discretionary |
| 71 | CHD    | Church & Dwight Co. Inc.            | 325611     | 2840     | Consumer Staples       |
| 72 | CI     | Cigna Corp                          | 524114     | 6324     | Health Care            |
| 73 | XEC    | Cimarex Energy Co.                  | 2111       | 1311     | Energy                 |
| 74 | CTAS   | Cintas Corp                         | 315220     | 2320     | Consumer Discretionary |
| 75 | CSCO   | Cisco Systems Inc                   | 334210     | 3576     | Technology             |
| 76 | CTXS   | Citrix Systems Inc.                 | 511210     | 7372     | Technology             |
| 77 | CLX    | Clorox Co (The)                     | 325612     | 2842     | Consumer Staples       |
| 78 | CMS    | CMS Energy Corp                     | 22111      | 4931     | Utilities              |
| 79 | KO     | Coca-Cola Co (The)                  | 312111     | 2086     | Consumer Staples       |
| 80 | CTSH   | Cognizant Technology Solutions Corp | 541512     | 7370     | Technology             |



| #   | Ticker | Company Name             | NAICS Code | SIC Code | Sector                 |
|-----|--------|--------------------------|------------|----------|------------------------|
| 81  | CL     | Colgate-Palmolive Co     | 325611     | 2844     | Consumer Staples       |
| 82  | CMCSA  | Comcast Corp             | 515210     | 4841     | Communications         |
| 83  | CAG    | Conagra Brands Inc       | 31142      | 2000     | Consumer Staples       |
| 84  | CXO    | Concho Resources Inc     | 2111       | 1311     | Energy                 |
| 85  | COP    | Conocophillips           | 2111       | 1311     | Energy                 |
| 86  | ED     | Consolidated Edison Inc. | 22111      | 4931     | Utilities              |
| 87  | STZ    | Constellation Brands Inc | 312120     | 2082     | Consumer Staples       |
| 88  | CPRT   | Copart Inc               | 425120     | 5010     | Consumer Discretionary |
| 89  | GLW    | Corning Inc              | 334419     | 3679     | Technology             |
| 90  | COST   | Costco Wholesale Corp    | 452311     | 5399     | Consumer Staples       |
| 91  | COTY   | Coty Inc                 | 325620     | 2844     | Consumer Staples       |
| 92  | CSX    | CSX Corp                 | 482111     | 4011     | Industrials            |
| 93  | CMI    | Cummins Inc.             | 333618     | 3510     | Industrials            |
| 94  | DHI    | D.R. Horton Inc.         | 236117     | 1531     | Consumer Discretionary |
| 95  | DRI    | Darden Restaurants Inc.  | 722511     | 5812     | Consumer Discretionary |
| 96  | DVA    | DaVita Inc               | 621492     | 8090     | Health Care            |
| 97  | DE     | Deere & Co               | 333111     | 3523     | Industrials            |
| 98  | DAL    | Delta Air Lines Inc      | 481111     | 4512     | Consumer Discretionary |
| 99  | DVN    | Devon Energy Corp        | 2111       | 1311     | Energy                 |
| 100 | DISCA  | Discovery Inc            | 515210     | 4841     | Communications         |
| 101 | DISH   | DISH Network Corp        | 515210     | 4841     | Communications         |
| 102 | DG     | Dollar General Corp      | 452990     | 5331     | Consumer Staples       |
| 103 | DLTR   | Dollar Tree Inc          | 452319     | 5331     | Consumer Staples       |
| 104 | D      | Dominion Energy Inc      | 22111      | 4911     | Utilities              |

| #   | Ticker | Company Name                                | NAICS Code | SIC Code | Sector                 |
|-----|--------|---------------------------------------------|------------|----------|------------------------|
| 105 | DOV    | Dover Corp                                  | 333415     | 3585     | Industrials            |
| 106 | DWDP   | DowDuPont Inc                               | 325211     | 2821     | Materials              |
| 107 | DTE    | DTE Energy Co                               | 2211       | 4931     | Utilities              |
| 108 | DUK    | Duke Energy Corp                            | 2211       | 4931     | Utilities              |
| 109 | DXC    | DXC Technology Company                      | 541512     | 7370     | Technology             |
| 110 | EMN    | Eastman Chemical Co                         | 325211     | 2821     | Materials              |
| 111 | ETN    | Eaton Corp Plc                              | 335314     | 3620     | Industrials            |
| 112 | EBAY   | eBay Inc.                                   | 519130     | 7370     | Consumer Discretionary |
| 113 | ECL    | Ecolab Inc.                                 | 325612     | 2842     | Materials              |
| 114 | EIX    | Edison International                        | 22111      | 4911     | Utilities              |
| 115 | EA     | Electronic Arts Inc.                        | 511210     | 7372     | Technology             |
| 116 | EMR    | Emerson Electric Co.                        | 334513     | 3823     | Industrials            |
| 117 | ETR    | Energy Corp.                                | 22111      | 4911     | Utilities              |
| 118 | EOG    | EOG Resources Inc.                          | 2111       | 1311     | Energy                 |
| 119 | EQT    | EQT Corp                                    | 2111       | 4923     | Energy                 |
| 120 | EFX    | Equifax Inc.                                | 561450     | 7323     | Technology             |
| 121 | EL     | Estee Lauder Companies Inc. (The)           | 325620     | 2844     | Consumer Staples       |
| 122 | EVRG   | Evergy Inc                                  | 22111      | 4931     | Utilities              |
| 123 | ES     | Eversource Energy                           | 2211       | 4931     | Utilities              |
| 124 | EXC    | Exelon Corp                                 | 22111      | 4911     | Utilities              |
| 125 | EXPE   | Expedia Group Inc                           | 561510     | 4700     | Communications         |
| 126 | EXPD   | Expeditors International of Washington Inc. | 488510     | 4731     | Industrials            |
| 127 | XOM    | Exxon Mobil Corp                            | 324110     | 2911     | Energy                 |
| 128 | FFIV   | F5 Networks Inc                             | 541512     | 7373     | Technology             |

| #   | Ticker | Company Name                               | NAICS Code | SIC Code | Sector                 |
|-----|--------|--------------------------------------------|------------|----------|------------------------|
| 129 | FB     | Facebook Inc                               | 519130     | 7370     | Communications         |
| 130 | FAST   | Fastenal Co                                | 423        | 5000     | Industrials            |
| 131 | FDX    | FedEx Corp.                                | 492110     | 4513     | Industrials            |
| 132 | FIS    | Fidelity National Information Services Inc | 518210     | 7374     | Financials             |
| 133 | FE     | FirstEnergy Corp.                          | 22111      | 4911     | Utilities              |
| 134 | FISV   | Fiserv Inc.                                | 518210     | 7374     | Financials             |
| 135 | FLT    | FleetCor Technologies Inc                  | 518210     | 7374     | Financials             |
| 136 | FLIR   | FLIR Systems Inc                           | 334511     | 3812     | Technology             |
| 137 | FLS    | Flowserve Corp.                            | 333914     | 3561     | Industrials            |
| 138 | FLR    | Fluor Corp                                 | 237990     | 1600     | Industrials            |
| 139 | FMC    | FMC Corp.                                  | 325320     | 2870     | Materials              |
| 140 | FL     | Foot Locker Inc.                           | 448210     | 5661     | Consumer Discretionary |
| 141 | F      | Ford Motor Co                              | 33611      | 3711     | Consumer Discretionary |
| 142 | FTNT   | Fortinet Inc                               | 334118     | 3577     | Technology             |
| 143 | FTV    | Fortive Corp                               | 334519     | 3829     | Industrials            |
| 144 | FBHS   | Fortune Brands Home & Security Inc         | 337110     | 2430     | Consumer Discretionary |
| 145 | FCX    | Freeport-McMoRan Inc                       | 212230     | 1000     | Materials              |
| 146 | GPS    | Gap Inc                                    | 448140     | 5651     | Consumer Discretionary |
| 147 | GRMN   | Garmin Ltd                                 | 334511     | 3812     | Technology             |
| 148 | IT     | Gartner Inc                                | 541910     | 8700     | Technology             |
| 149 | GD     | General Dynamics Corp                      | 336411     | 3721     | Industrials            |
| 150 | GE     | General Electric Co                        | 999977     | 9997     | Industrials            |
| 151 | GIS    | General Mills Inc.                         | 311230     | 2040     | Consumer Staples       |
| 152 | GM     | General Motors Co                          | 33611      | 3711     | Consumer Discretionary |

| #   | Ticker | Company Name                      | NAICS Code | SIC Code | Sector                 |
|-----|--------|-----------------------------------|------------|----------|------------------------|
| 153 | GPC    | Genuine Parts Co                  | 423120     | 5013     | Consumer Discretionary |
| 154 | GPN    | Global Payments Inc.              | 518210     | 7374     | Financials             |
| 155 | GT     | Goodyear Tire & Rubber Co         | 326211     | 3011     | Consumer Discretionary |
| 156 | GWW    | Grainger (W.W.) Inc               | 42         | 5000     | Industrials            |
| 157 | HAL    | Halliburton Co                    | 213112     | 1389     | Energy                 |
| 158 | HBI    | Hanesbrands Inc                   | 315        | 2300     | Consumer Discretionary |
| 159 | HOG    | Harley-Davidson Inc.              | 336991     | 3751     | Consumer Discretionary |
| 160 | HRS    | Harris Corp                       | 334511     | 3812     | Energy                 |
| 161 | HAS    | Hasbro Inc.                       | 339930     | 3944     | Consumer Discretionary |
| 162 | HCA    | HCA Healthcare Inc                | 622110     | 8062     | Health Care            |
| 163 | HP     | Helmerich & Payne Inc.            | 213111     | 1381     | Energy                 |
| 164 | HSY    | Hershey Co (The)                  | 311351     | 2060     | Consumer Staples       |
| 165 | HES    | Hess Corp                         | 2111       | 1311     | Energy                 |
| 166 | HPE    | Hewlett Packard Enterprise Co     | 334111     | 3571     | Technology             |
| 167 | HLT    | Hilton Worldwide Holdings Inc     | 721110     | 7011     | Consumer Discretionary |
| 168 | HFC    | HollyFrontier Corp                | 324110     | 2911     | Energy                 |
| 169 | HD     | Home Depot Inc. (The)             | 444110     | 5211     | Consumer Discretionary |
| 170 | HON    | Honeywell International Inc       | 336413     | 9997     | Industrials            |
| 171 | HRL    | Hormel Foods Corp                 | 311611     | 2011     | Consumer Staples       |
| 172 | HPQ    | HP Inc                            | 33411      | 3570     | Technology             |
| 173 | HUM    | Humana Inc.                       | 621491     | 6324     | Health Care            |
| 174 | HII    | Huntington Ingalls Industries Inc | 336611     | 3730     | Industrials            |
| 175 | INFO   | IHS Markit Ltd                    | 519130     | 7370     | Technology             |
| 176 | ITW    | Illinois Tool Works Inc.          | 33399      | 3560     | Industrials            |

| #   | Ticker | Company Name                               | NAICS Code | SIC Code | Sector                 |
|-----|--------|--------------------------------------------|------------|----------|------------------------|
| 177 | IR     | Ingersoll-Rand PLC                         | 333415     | 3585     | Industrials            |
| 178 | INTC   | Intel Corp                                 | 334413     | 3674     | Technology             |
| 179 | IBM    | International Business Machines Corp       | 519130     | 7370     | Technology             |
| 180 | IFF    | International Flavors & Fragrances Inc     | 325199     | 2860     | Materials              |
| 181 | IP     | International Paper Co                     | 322130     | 2631     | Materials              |
| 182 | IPG    | Interpublic Group of Companies Inc. (The)  | 541810     | 7311     | Communications         |
| 183 | INTU   | Intuit Inc.                                | 511210     | 7372     | Technology             |
| 184 | IPGP   | IPG Photonics Corp                         | 334413     | 3674     | Technology             |
| 185 | IQV    | Iqvia Holdings Inc                         | 54171      | 8731     | Health Care            |
| 186 | JBHT   | J.B. Hunt Transport Services Inc.          | 484121     | 4213     | Industrials            |
| 187 | SJM    | J.M. Smucker Co (The)                      | 311421     | 2033     | Consumer Staples       |
| 188 | JEC    | Jacobs Engineering Group Inc.              | 236210     | 1600     | Industrials            |
| 189 | JCI    | Johnson Controls International Plc         | 333415     | 3585     | Industrials            |
| 190 | JNPR   | Juniper Networks Inc                       | 334118     | 3576     | Technology             |
| 191 | KSU    | Kansas City Southern                       | 482111     | 4011     | Industrials            |
| 192 | K      | Kellogg Co                                 | 311230     | 2040     | Consumer Staples       |
| 193 | KMB    | Kimberly-Clark Corp                        | 322121     | 2621     | Consumer Staples       |
| 194 | KMI    | Kinder Morgan Inc.                         | 486210     | 4923     | Energy                 |
| 195 | KLAC   | KLA-Tencor Corp                            | 333314     | 3827     | Technology             |
| 196 | KSS    | Kohl's Corp                                | 452111     | 5311     | Consumer Discretionary |
| 197 | KR     | Kroger Co. (The)                           | 445110     | 5411     | Consumer Staples       |
| 198 | LB     | L Brands Inc                               | 448190     | 5600     | Consumer Discretionary |
| 199 | LLL    | L3 Technologies Inc                        | 334511     | 3812     | Industrials            |
| 200 | LH     | Laboratory Corporation of America Holdings | 621511     | 8071     | Health Care            |

| #   | Ticker | Company Name                     | NAICS Code | SIC Code | Sector                 |
|-----|--------|----------------------------------|------------|----------|------------------------|
| 201 | LRCX   | Lam Research Corp                | 333242     | 3559     | Technology             |
| 202 | LEG    | Leggett & Platt Inc              | 337910     | 2510     | Consumer Discretionary |
| 203 | LEN    | Lennar Corp                      | 236117     | 1531     | Consumer Discretionary |
| 204 | LIN    | Linde Plc                        | 325120     | 2810     | Materials              |
| 205 | LKQ    | LKQ Corp                         | 423140     | 5010     | Consumer Discretionary |
| 206 | LMT    | Lockheed Martin Corp             | 336414     | 3760     | Industrials            |
| 207 | LOW    | Lowe's Cos Inc.                  | 444110     | 5211     | Consumer Discretionary |
| 208 | LYB    | LyondellBasell Industries NV     | 325220     | 2820     | Materials              |
| 209 | M      | Macy's Inc                       | 452210     | 5311     | Consumer Discretionary |
| 210 | MRO    | Marathon Oil Corp                | 2111       | 1311     | Energy                 |
| 211 | MPC    | Marathon Petroleum Corp          | 324110     | 2911     | Energy                 |
| 212 | MAR    | Marriott International Inc       | 721110     | 7011     | Consumer Discretionary |
| 213 | MLM    | Martin Marietta Materials Inc.   | 212313     | 1400     | Materials              |
| 214 | MAS    | Masco Corp                       | 332913     | 3430     | Consumer Discretionary |
| 215 | MAT    | Mattel Inc.                      | 339930     | 3942     | Consumer Discretionary |
| 216 | MKC    | McCormick & Co Inc               | 311942     | 2090     | Consumer Staples       |
| 217 | MCD    | McDonald's Corp                  | 722513     | 5812     | Consumer Discretionary |
| 218 | MTD    | Mettler-Toledo International Inc | 334516     | 3826     | Health Care            |
| 219 | MGM    | MGM Resorts International        | 721120     | 7990     | Consumer Discretionary |
| 220 | MCHP   | Microchip Technology Inc         | 334413     | 3674     | Technology             |
| 221 | MU     | Micron Technology Inc.           | 334413     | 3674     | Technology             |
| 222 | MSFT   | Microsoft Corp                   | 511210     | 7372     | Technology             |

| #   | Ticker | Company Name                       | NAICS Code | SIC Code | Sector                 |
|-----|--------|------------------------------------|------------|----------|------------------------|
| 223 | MHK    | Mohawk Industries Inc.             | 314110     | 2273     | Consumer Discretionary |
| 224 | TAP    | Molson Coors Brewing Co            | 312120     | 2082     | Consumer Staples       |
| 225 | MDLZ   | Mondelez International Inc         | 311821     | 2052     | Consumer Staples       |
| 226 | MNST   | Monster Beverage Corp              | 312111     | 2086     | Consumer Staples       |
| 227 | MCO    | Moody's Corp.                      | 561450     | 7323     | Technology             |
| 228 | MOS    | Mosaic Company (The)               | 3253       | 2870     | Materials              |
| 229 | MSI    | Motorola Solutions Inc             | 334220     | 3663     | Technology             |
| 230 | MSCI   | MSCI Inc                           | 523930     | 6282     | Technology             |
| 231 | NOV    | National Oilwell Varco Inc         | 333132     | 3533     | Energy                 |
| 232 | NTAP   | NetApp Inc                         | 334112     | 3572     | Technology             |
| 233 | NFLX   | Netflix Inc                        | 532282     | 7841     | Communications         |
| 234 | NWL    | Newell Brands Inc                  | 3399       | 3990     | Consumer Discretionary |
| 235 | NFX    | Newfield Exploration Co            | 211111     | 1311     | Energy                 |
| 236 | NEM    | Newmont Mining Corp                | 212221     | 1040     | Materials              |
| 237 | NWSA   | News Corp                          | 511110     | 2711     | Communications         |
| 238 | NEE    | NextEra Energy Inc                 | 22111      | 4911     | Utilities              |
| 239 | NLSN   | Nielsen Holdings plc               | 541910     | 8700     | Technology             |
| 240 | NKE    | Nike Inc                           | 316210     | 3021     | Consumer Discretionary |
| 241 | NI     | NiSource Inc                       | 221210     | 4932     | Utilities              |
| 242 | NBL    | Noble Energy Inc                   | 2111       | 1311     | Energy                 |
| 243 | JWN    | Nordstrom Inc.                     | 448140     | 5651     | Consumer Discretionary |
| 244 | NSC    | Norfolk Southern Corp              | 482111     | 4011     | Industrials            |
| 245 | NOC    | Northrop Grumman Corp              | 334511     | 3812     | Industrials            |
| 246 | NCLH   | Norwegian Cruise Line Holdings Ltd | 483112     | 4400     | Consumer Discretionary |
| 247 | NRG    | NRG Energy Inc                     | 22111      | 4911     | Utilities              |
| 248 | NUE    | Nucor Corp                         | 331110     | 3312     | Materials              |

| #   | Ticker | Company Name                        | NAICS Code | SIC Code | Sector                 |
|-----|--------|-------------------------------------|------------|----------|------------------------|
| 249 | NVDA   | NVIDIA Corp                         | 334413     | 3674     | Technology             |
| 250 | OXY    | Occidental Petroleum Corp           | 2111       | 1311     | Energy                 |
| 251 | OMC    | Omnicom Group Inc.                  | 541810     | 7311     | Communications         |
| 252 | OKE    | ONEOK Inc.                          | 221210     | 4923     | Energy                 |
| 253 | ORCL   | Oracle Corp                         | 511210     | 7372     | Technology             |
| 254 | ORLY   | O'Reilly Automotive Inc             | 441310     | 5531     | Consumer Discretionary |
| 255 | PCAR   | PACCAR Inc                          | 336120     | 3711     | Industrials            |
| 256 | PKG    | Packaging Corp Of America           | 322211     | 2650     | Materials              |
| 257 | PH     | Parker-Hannifin Corp                | 332912     | 3490     | Industrials            |
| 258 | PAYX   | Paychex Inc.                        | 541214     | 8721     | Technology             |
| 259 | PYPL   | PayPal Holdings Inc                 | 518210     | 7374     | Financials             |
| 260 | PNR    | Pentair plc                         | 333914     | 3561     | Industrials            |
| 261 | PEP    | PepsiCo Inc                         | 31211      | 2080     | Consumer Staples       |
| 262 | PKI    | PerkinElmer Inc.                    | 334516     | 3826     | Health Care            |
| 263 | PCG    | PG&E Corp                           | 2211       | 4931     | Utilities              |
| 264 | PM     | Philip Morris International Inc     | 312230     | 2111     | Consumer Staples       |
| 265 | PSX    | Phillips 66                         | 324110     | 2911     | Energy                 |
| 266 | PNW    | Pinnacle West Capital Corp          | 2211       | 4911     | Utilities              |
| 267 | PXD    | Pioneer Natural Resources Co        | 2111       | 1311     | Energy                 |
| 268 | PPG    | PPG Industries Inc.                 | 325510     | 2851     | Materials              |
| 269 | PPL    | PPL Corp                            | 2211       | 4911     | Utilities              |
| 270 | PG     | Procter & Gamble Co (The)           | 325611     | 2840     | Consumer Staples       |
| 271 | PEG    | Public Service Enterprise Group Inc | 22111      | 4931     | Utilities              |
| 272 | PHM    | PulteGroup Inc                      | 236117     | 1531     | Consumer Discretionary |



| #   | Ticker | Company Name                   | NAICS Code | SIC Code | Sector                 |
|-----|--------|--------------------------------|------------|----------|------------------------|
| 273 | PVH    | PVH Corp                       | 315        | 2300     | Consumer Discretionary |
| 274 | QRVO   | Qorvo Inc                      | 334413     | 3674     | Technology             |
| 275 | QCOM   | QUALCOMM Inc.                  | 334413     | 3674     | Technology             |
| 276 | PWR    | Quanta Services Inc.           | 238210     | 1731     | Industrials            |
| 277 | DGX    | Quest Diagnostics Inc          | 621511     | 8071     | Health Care            |
| 278 | RL     | Ralph Lauren Corp              | 31522      | 2320     | Consumer Discretionary |
| 279 | RTN    | Raytheon Co.                   | 334511     | 3812     | Industrials            |
| 280 | RHT    | Red Hat Inc                    | 511210     | 7372     | Technology             |
| 281 | RSG    | Republic Services Inc.         | 562111     | 4953     | Industrials            |
| 282 | RHI    | Robert Half International Inc. | 561320     | 7363     | Consumer Discretionary |
| 283 | ROK    | Rockwell Automation Inc.       | 335314     | 3620     | Industrials            |
| 284 | COL    | Rockwell Collins Inc           | 336413     | 3728     | Industrials            |
| 285 | ROL    | Rollins Inc.                   | 561710     | 7340     | Consumer Discretionary |
| 286 | ROP    | Roper Technologies Inc         | 334513     | 3823     | Industrials            |
| 287 | ROST   | Ross Stores Inc                | 448140     | 5651     | Consumer Discretionary |
| 288 | RCL    | Royal Caribbean Cruises Ltd    | 483112     | 4400     | Consumer Discretionary |
| 289 | SPGI   | S&P Global Inc                 | 561450     | 7323     | Technology             |
| 290 | CRM    | salesforce.com Inc             | 511210     | 7372     | Technology             |
| 291 | SCG    | SCANA Corp                     | 22111      | 4931     | Utilities              |
| 292 | SLB    | Schlumberger Ltd               | 213112     | 1389     | Energy                 |
| 293 | STX    | Seagate Technology Plc         | 334112     | 3572     | Technology             |
| 294 | SEE    | Sealed Air Corp                | 326113     | 3081     | Materials              |
| 295 | SRE    | Sempra Energy                  | 22111      | 4931     | Utilities              |
| 296 | SHW    | Sherwin-Williams Co (The)      | 325510     | 2851     | Materials              |

| #   | Ticker | Company Name                      | NAICS Code | SIC Code | Sector                 |
|-----|--------|-----------------------------------|------------|----------|------------------------|
| 297 | SWKS   | Skyworks Solutions Inc            | 334413     | 3674     | Technology             |
| 298 | SNA    | Snap-On Inc                       | 332216     | 3420     | Consumer Discretionary |
| 299 | SO     | Southern Co (The)                 | 2211       | 4911     | Utilities              |
| 300 | LUV    | Southwest Airlines Co.            | 481111     | 4512     | Consumer Discretionary |
| 301 | SWK    | Stanley Black & Decker Inc        | 333991     | 3540     | Consumer Discretionary |
| 302 | SBUX   | Starbucks Corp                    | 722513     | 5812     | Consumer Discretionary |
| 303 | SRCL   | Stericycle Inc                    | 562211     | 4955     | Industrials            |
| 304 | SYMC   | Symantec Corp                     | 511210     | 7372     | Technology             |
| 305 | SNPS   | Synopsys Inc                      | 511210     | 7372     | Technology             |
| 306 | SYT    | Sysco Corp                        | 4244       | 5140     | Consumer Staples       |
| 307 | TTWO   | Take-Two Interactive Software Inc | 511210     | 7372     | Technology             |
| 308 | TPR    | Tapestry Inc                      | 316992     | 3100     | Consumer Discretionary |
| 309 | TGT    | Target Corp                       | 452319     | 5331     | Consumer Staples       |
| 310 | TEL    | TE Connectivity Ltd               | 334417     | 3678     | Industrials            |
| 311 | FTI    | TechnipFMC plc                    | 237120     | 1389     | Energy                 |
| 312 | TXN    | Texas Instruments Inc             | 334413     | 3674     | Technology             |
| 313 | TXT    | Textron Inc                       | 336411     | 3721     | Industrials            |
| 314 | KHC    | The Kraft Heinz Co                | 31142      | 2030     | Consumer Staples       |
| 315 | TIF    | Tiffany & Co.                     | 448310     | 5944     | Consumer Discretionary |
| 316 | TJX    | TJX Companies Inc (The)           | 448140     | 5651     | Consumer Discretionary |
| 317 | TSS    | Total System Services Inc.        | 522320     | 7389     | Financials             |
| 318 | TSCO   | Tractor Supply Co                 | 453998     | 5200     | Consumer Discretionary |
| 319 | TDG    | TransDigm Group Inc               | 336413     | 3728     | Industrials            |
| 320 | TRIP   | TripAdvisor Inc                   | 519130     | 7370     | Communications         |

| #   | Ticker | Company Name                    | NAICS Code | SIC Code | Sector                 |
|-----|--------|---------------------------------|------------|----------|------------------------|
| 321 | TFCFA  | TWENTY-FIRST CENTURY FOX INC    | 515210     | 4888     | Communications         |
| 322 | TWTR   | Twitter Inc                     | 519130     | 7370     | Communications         |
| 323 | TSN    | Tyson Foods Inc.                | 311611     | 2011     | Consumer Staples       |
| 324 | ULTA   | Ulta Beauty Inc                 | 446120     | 5990     | Consumer Discretionary |
| 325 | UAA    | Under Armour Inc                | 315        | 2300     | Consumer Discretionary |
| 326 | UNP    | Union Pacific Corp              | 482111     | 4011     | Industrials            |
| 327 | UAL    | United Continental Holdings Inc | 481111     | 4512     | Consumer Discretionary |
| 328 | UPS    | United Parcel Service Inc       | 492110     | 4210     | Industrials            |
| 329 | URI    | United Rentals Inc.             | 532412     | 7350     | Industrials            |
| 330 | UTX    | United Technologies Corp        | 336412     | 3724     | Industrials            |
| 331 | UNH    | Unitedhealth Group Inc          | 524114     | 6324     | Health Care            |
| 332 | UHS    | Universal Health Services Inc.  | 622110     | 8062     | Health Care            |
| 333 | VFC    | V.F. Corp                       | 315220     | 2320     | Consumer Discretionary |
| 334 | VLO    | Valero Energy Corp              | 324110     | 2911     | Energy                 |
| 335 | VRSN   | Verisign Inc                    | 519130     | 7370     | Communications         |
| 336 | VRSK   | Verisk Analytics Inc            | 524298     | 6411     | Technology             |
| 337 | VZ     | Verizon Communications Inc      | 517312     | 4812     | Communications         |
| 338 | VIAB   | Viacom Inc                      | 515120     | 4833     | Communications         |
| 339 | VMC    | Vulcan Materials Co             | 212319     | 1400     | Materials              |
| 340 | WBA    | Walgreens Boots Alliance Inc    | 446110     | 5912     | Consumer Staples       |
| 341 | WMT    | Walmart Inc                     | 452319     | 5331     | Consumer Staples       |
| 342 | DIS    | Walt Disney Co (The)            | 515120     | 4888     | Communications         |
| 343 | WM     | Waste Management Inc.           | 562111     | 4953     | Industrials            |
| 344 | WAT    | Waters Corp                     | 334516     | 3826     | Health Care            |

| #   | Ticker | Company Name              | NAICS Code | SIC Code | Sector                 |
|-----|--------|---------------------------|------------|----------|------------------------|
| 345 | WEC    | WEC Energy Group Inc      | 2211       | 4931     | Utilities              |
| 346 | WCG    | WellCare Health Plans Inc | 524114     | 6324     | Health Care            |
| 347 | WDC    | Western Digital Corp      | 334112     | 3572     | Technology             |
| 348 | WU     | Western Union Co          | 522320     | 6099     | Financials             |
| 349 | WRK    | WestRock Co               | 322211     | 2650     | Materials              |
| 350 | WHR    | Whirlpool Corp            | 3352       | 3630     | Consumer Discretionary |
| 351 | WMB    | Williams Cos Inc. (The)   | 486210     | 4922     | Energy                 |
| 352 | WYNN   | Wynn Resorts Ltd          | 721120     | 7990     | Consumer Discretionary |
| 353 | XEL    | Xcel Energy Inc.          | 2211       | 4931     | Utilities              |
| 354 | XRX    | Xerox Corp                | 333316     | 3577     | Technology             |
| 355 | XLNX   | Xilinx Inc.               | 334413     | 3674     | Technology             |
| 356 | XYL    | Xylem Inc                 | 333914     | 3561     | Industrials            |
| 357 | YUM    | YUM! Brands Inc.          | 722513     | 5812     | Consumer Discretionary |

### Panel C: Healthcare Dataset<sup>a</sup>

| # | Company Name                | Healthcare Sector             |
|---|-----------------------------|-------------------------------|
| 1 | Abbott Laboratories         | Pharmaceutical                |
| 2 | AbbVie Inc                  | Pharmaceutical                |
| 3 | ABIOMED Inc                 | Other Products                |
| 4 | Aetna Inc.                  | Insurance and Health Services |
| 5 | AFLAC Inc                   | Insurance and Health Services |
| 6 | Agilent Technologies Inc    | Other Products                |
| 7 | Alexion Pharmaceuticals Inc | Pharmaceutical                |
| 8 | Align Technology Inc        | Other Products                |

| #  | Company Name                | Healthcare Sector                 |
|----|-----------------------------|-----------------------------------|
| 9  | Allergan PLC                | Pharmaceutical                    |
| 10 | AmerisourceBergen Corp      | Distribution, Retail, Information |
| 11 | Amgen Inc                   | Pharmaceutical                    |
| 12 | Anthem Inc                  | Insurance and Health Services     |
| 13 | Astrazeneca PLC             | Pharmaceutical                    |
| 14 | Bard (C.R.) Inc             | Other Products                    |
| 15 | Bausch Health Cos Inc       | Pharmaceutical                    |
| 16 | Baxter International Inc    | Pharmaceutical                    |
| 17 | Bayer AG                    | Pharmaceutical                    |
| 18 | Becton Dickinson and Co     | Distribution, Retail, Information |
| 19 | Biogen Inc                  | Pharmaceutical                    |
| 20 | Biomarin Pharmaceutical Inc | Pharmaceutical                    |
| 21 | Boston Scientific Corp      | Other Products                    |
| 22 | Bristol-Myers Squibb Co     | Pharmaceutical                    |
| 23 | Cardinal Health Inc         | Distribution, Retail, Information |
| 24 | Celgene Corp                | Pharmaceutical                    |
| 25 | Centene Corp                | Insurance and Health Services     |
| 26 | Cerner Corp                 | Distribution, Retail, Information |
| 27 | Cigna Corp                  | Insurance and Health Services     |
| 28 | Cooper Companies Inc. (The) | Distribution, Retail, Information |
| 29 | CVS Health Corp             | Distribution, Retail, Information |
| 30 | Danaher Corp                | Other Products                    |
| 31 | DaVita Inc                  | Insurance and Health Services     |
| 32 | DENTSPLY SIRONA Inc         | Other Products                    |
| 33 | Edwards Lifesciences Corp   | Other Products                    |

| #  | Company Name                               | Healthcare Sector                 |
|----|--------------------------------------------|-----------------------------------|
| 34 | Eisai Co Ltd                               | Pharmaceutical                    |
| 35 | Eli Lilly and Co                           | Pharmaceutical                    |
| 36 | Endo International plc                     | Pharmaceutical                    |
| 37 | Express Scripts Holding Co                 | Distribution, Retail, Information |
| 38 | Fresenius Medical Care AG &Co KGAA         | Pharmaceutical                    |
| 39 | Gilead Sciences Inc                        | Pharmaceutical                    |
| 40 | Glaxosmithkline PLC                        | Pharmaceutical                    |
| 41 | HCA Healthcare Inc                         | Insurance and Health Services     |
| 42 | Henry Schein Inc                           | Distribution, Retail, Information |
| 43 | Hologic Inc                                | Other Products                    |
| 44 | Humana Inc.                                | Insurance and Health Services     |
| 45 | IDEXX Laboratories Inc                     | Other Products                    |
| 46 | Illumina Inc                               | Other Products                    |
| 47 | Incyte Corp                                | Pharmaceutical                    |
| 48 | Intuitive Surgical Inc                     | Other Products                    |
| 49 | Iqvia Holdings Inc                         | Distribution, Retail, Information |
| 50 | Johnson & Johnson                          | Pharmaceutical                    |
| 51 | Laboratory Corporation of America Holdings | Insurance and Health Services     |
| 52 | Lincoln National Corp                      | Insurance and Health Services     |
| 53 | Mallinckrodt Plc                           | Pharmaceutical                    |
| 54 | McKesson Corp                              | Distribution, Retail, Information |
| 55 | Medtronic PLC                              | Other Products                    |
| 56 | Merck & Co Inc.                            | Pharmaceutical                    |
| 57 | Mylan NV                                   | Pharmaceutical                    |
| 58 | Nektar Therapeutics                        | Pharmaceutical                    |

| #  | Company Name                       | Healthcare Sector                 |
|----|------------------------------------|-----------------------------------|
| 59 | Novartis AG                        | Pharmaceutical                    |
| 60 | Novo Nordisk A/S                   | Pharmaceutical                    |
| 61 | Patterson Companies Inc            | Distribution, Retail, Information |
| 62 | PerkinElmer Inc.                   | Other Products                    |
| 63 | Perrigo Co Plc                     | Other Products                    |
| 64 | Pfizer Inc                         | Pharmaceutical                    |
| 65 | Principal Financial Group Inc.     | Insurance and Health Services     |
| 66 | Prudential Financial Inc           | Insurance and Health Services     |
| 67 | Quest Diagnostics Inc              | Insurance and Health Services     |
| 68 | Regeneron Pharmaceuticals Inc      | Pharmaceutical                    |
| 69 | Resmed Inc                         | Other Products                    |
| 70 | Roche Holding AG                   | Pharmaceutical                    |
| 71 | Sanofi                             | Pharmaceutical                    |
| 72 | Shire PLC                          | Pharmaceutical                    |
| 73 | Stryker Corp                       | Other Products                    |
| 74 | Teva Pharmaceutical Industries Ltd | Pharmaceutical                    |
| 75 | Thermo Fisher Scientific Inc       | Other Products                    |
| 76 | Torchmark Corp                     | Insurance and Health Services     |
| 77 | United Therapeutics Corp           | Pharmaceutical                    |
| 78 | Unitedhealth Group Inc             | Insurance and Health Services     |
| 79 | Universal Health Services Inc.     | Insurance and Health Services     |
| 80 | Unum Group                         | Insurance and Health Services     |
| 81 | Varian Medical Systems Inc         | Other Products                    |
| 82 | Vertex Pharmaceuticals Inc         | Pharmaceutical                    |
| 83 | Walgreens Boots Alliance Inc       | Distribution, Retail, Information |

| #  | Company Name               | Healthcare Sector             |
|----|----------------------------|-------------------------------|
| 84 | Waters Corp                | Other Products                |
| 85 | WellCare Health Plans Inc  | Insurance and Health Services |
| 86 | Zimmer Biomet Holdings Inc | Other Products                |
| 87 | Zoetis Inc                 | Other Products                |

<sup>a</sup> NAISC and SIC codes shown in Panel A and Panel B



**eTable 2. Summary statistics on pharmaceutical and S&P 500 datasets, 2000-2018**

|                              | Pharmaceutical          |                        | S&P 500                 |                        |
|------------------------------|-------------------------|------------------------|-------------------------|------------------------|
| <b>N (companies)</b>         | 35                      |                        | 357                     |                        |
| <b>N (fiscal years)</b>      | 631                     |                        | 6,258                   |                        |
|                              | \$ billion <sup>a</sup> | % revenue <sup>b</sup> | \$ billion <sup>a</sup> | % revenue <sup>b</sup> |
| <b>Revenue</b>               | \$11,514                |                        | \$130,501               |                        |
| <b>Market capitalization</b> | \$40,193                |                        | \$188,469               |                        |
| <b>Expenses</b>              |                         |                        |                         |                        |
| COGS                         | \$2,934                 | 25.5%                  | \$88,373                | 67.7%                  |
| R&D                          | \$1,667                 | 14.5%                  | \$2,728                 | 2.1%                   |
| SG&A                         | \$3,230                 | 28.1%                  | \$16,673                | 12.8%                  |
| <b>Profits</b>               |                         |                        |                         |                        |
| Gross profit                 | \$8,580                 | 74.5%                  | \$42,128                | 32.3%                  |
| EBITDA                       | \$3,712                 | 32.2%                  | \$22,782                | 17.5%                  |
| Net income                   | \$1,864                 | 16.2%                  | \$9,371                 | 7.2%                   |

<sup>a</sup> Values in U.S. dollars inflation adjusted to 2016. Data represents the sum of values in the pharmaceutical and S&P 500 datasets.

<sup>b</sup> Sum of expense or profit metrics divided by the sum of revenues, expressed as % revenues. This is equivalent to a weighted average value. Gross profit expressed as % revenues is gross profit margin. EBITDA expressed as % revenues is EBITDA margin. Net income expressed as % revenues is net income margin.

**eTable 3. Median and IQR of profit margins for pharmaceutical companies and other sectors of the S&P 500, 2000–2018.**

| <b>S&amp;P 500 Sector<sup>a</sup></b> | <b>Companies<br/>N</b> | <b>Observations<sup>b</sup><br/>N</b> | <b>Gross profit margin<br/>Median (IQR)<sup>c</sup><br/>% revenue</b> | <b>EBITDA margin<br/>Median (IQR)<sup>c</sup><br/>% revenue</b> | <b>Net income margin<br/>Median (IQR)<sup>c</sup><br/>% revenue</b> |
|---------------------------------------|------------------------|---------------------------------------|-----------------------------------------------------------------------|-----------------------------------------------------------------|---------------------------------------------------------------------|
| Pharmaceutical                        | 35                     | 631                                   | 76.5 (54.5 to 85.8)                                                   | 29.4 (20.3 to 37.9)                                             | 13.8 (4.4 to 20.8)                                                  |
| Communications                        | 22                     | 350                                   | 47.2 (34.9 to 66.1)                                                   | 25.1 (16.3 to 36.5)                                             | 8.1 (3.6 to 14.5)                                                   |
| Consumer Discretionary                | 71                     | 1267                                  | 35.4 (25.0 to 45.6)                                                   | 13.9 (10.6 to 18.9)                                             | 6.2 (3.7 to 9.2)                                                    |
| Consumer Staples                      | 35                     | 636                                   | 40.6 (29.2 to 52.7)                                                   | 18.0 (9.9 to 22.4)                                              | 8.0 (3.8 to 11.8)                                                   |
| Energy                                | 31                     | 534                                   | 33.8 (18.5 to 63.1)                                                   | 24.2 (12.7 to 50.5)                                             | 7.0 (2.4 to 17.2)                                                   |
| Health Care (other)                   | 17                     | 299                                   | 27.1 (18.3 to 45.1)                                                   | 13.9 (8.1 to 19.7)                                              | 5.6 (3.6 to 8.6)                                                    |
| Industrials                           | 54                     | 944                                   | 30.8 (20.1 to 38.7)                                                   | 15.5 (11.9 to 21.8)                                             | 7.2 (4.3 to 10.1)                                                   |
| Materials                             | 25                     | 456                                   | 33.0 (25.3 to 43.1)                                                   | 18.7 (13.6 to 24.5)                                             | 7.2 (4.3 to 10.8)                                                   |
| Technology                            | 65                     | 1121                                  | 61.1 (46.5 to 75.6)                                                   | 24.4 (16.6 to 33.9)                                             | 13.1 (6.2 to 20.3)                                                  |
| Utilities                             | 29                     | 541                                   | 28.8 (23.3 to 33.4)                                                   | 28.7 (23.3 to 33.2)                                             | 8.4 (5.5 to 11.0)                                                   |
| Other                                 | 8                      | 110                                   | 44.6 (25.4 to 52.8)                                                   | 25.2 (21.8 to 29.7)                                             | 11.9 (8.1 to 14.3)                                                  |

<sup>a</sup> Companies in the S&P 500 dataset were classified by the Bloomberg Industry Classification System. Health Care (other) comprised companies classified as Health Care, but excluding pharmaceutical companies. “Other” was comprised primarily of companies in financial services and real estate that were included in the S&P 500 dataset. Sectors are ordered alphabetically.

<sup>b</sup> Each observation represents data from one company for one fiscal year.

<sup>c</sup> Displays the median profit margin (as a percentage of revenue). The 25<sup>th</sup> and 75<sup>th</sup> percentile of the profit margin are displayed in parentheses.

**eTable 4. Median profit margins of selected large technology companies, 2000-2018**

| <b>Company Name</b> | <b>Observations<sup>a</sup><br/>N</b> | <b>Gross profit margin<br/>Median<sup>b</sup><br/>% revenue</b> | <b>EBITDA margin<br/>Median<sup>b</sup><br/>% revenue</b> | <b>Net income margin<br/>Median<sup>b</sup><br/>% revenue</b> |
|---------------------|---------------------------------------|-----------------------------------------------------------------|-----------------------------------------------------------|---------------------------------------------------------------|
| Apple               | 19                                    | 40.8                                                            | 29.0                                                      | 19.2                                                          |
| Amazon              | 19                                    | 26.8                                                            | 6.0                                                       | 1.7                                                           |
| Alphabet            | 15                                    | 65.8                                                            | 33.0                                                      | 21.9                                                          |
| Microsoft           | 19                                    | 83.1                                                            | 41.7                                                      | 27.6                                                          |

<sup>a</sup> Each observation represents data from one company for one fiscal year.

<sup>b</sup> Displays the median profit margin (as a percentage of revenue).

**eTable 5. Median and IQR of profit margins for pharmaceutical companies and subsectors of the healthcare dataset, 2000–2018.**

| <b>Healthcare Subsector<sup>a</sup></b> | <b>Companies<br/>N</b> | <b>Observations<sup>b</sup><br/>N</b> | <b>Gross profit margin<br/>Median (IQR)<sup>c</sup><br/>% revenue</b> | <b>EBITDA margin<br/>Median (IQR)<sup>c</sup><br/>% revenue</b> | <b>Net income margin<br/>Median (IQR)<sup>c</sup><br/>% revenue</b> |
|-----------------------------------------|------------------------|---------------------------------------|-----------------------------------------------------------------------|-----------------------------------------------------------------|---------------------------------------------------------------------|
| Pharmaceuticals                         | 35                     | 631                                   | 76.5 (54.5 to 85.8)                                                   | 29.4 (20.3 to 37.9)                                             | 13.8 (4.4 to 20.8)                                                  |
| Distribution, Retail, Information       | 12                     | 212                                   | 28.3 (6.9 to 41.9)                                                    | 7.2 (3.7 to 18.8)                                               | 3.6 (1.4 to 7.4)                                                    |
| Insurance, Health Services              | 18                     | 310                                   | 20.1 (13.9 to 26.7)                                                   | 12.5 (7.9 to 19.1)                                              | 5.9 (3.7 to 8.9)                                                    |
| Other Products                          | 22                     | 399                                   | 64.4 (51.5 to 73.2)                                                   | 23.6 (18.6 to 29.8)                                             | 12.1 (6.4 to 17.0)                                                  |

<sup>a</sup> Companies in the healthcare sector of the S&P 500, but not the pharmaceutical dataset, were subclassified as “Distribution, Retail, Information,” “Insurance, health services,” or “Other Products.”

<sup>b</sup> Each observation represents data from one company for one fiscal year.

<sup>c</sup> Displays the median profit margin (as a percentage of revenue). The 25<sup>th</sup> and 75<sup>th</sup> percentile of the profit margin are displayed in parentheses.

**eTable 6. Median and IQR difference between profit margins of pharmaceutical companies and subsectors of the healthcare dataset, 2000–2018.**

| Healthcare subset                 | Gross profit margin <sup>a</sup> (% revenue) |                      | EBITDA margin <sup>a</sup> (% revenue)  |                      | Net income margin <sup>a</sup> (% revenue) |                      |
|-----------------------------------|----------------------------------------------|----------------------|-----------------------------------------|----------------------|--------------------------------------------|----------------------|
|                                   | Median difference (95% CI) <sup>b</sup>      | P-value <sup>c</sup> | Median difference (95% CI) <sup>b</sup> | P-value <sup>c</sup> | Median difference (95% CI)                 | P-value <sup>c</sup> |
| Distribution, Retail, Information | -44.8 (-48.0 to -40.1)                       | p<0.001              | -18.8 (-20.7 to -17.0)                  | p<0.001              | -8.0 (-9.6 to -6.3)                        | p<0.001              |
| Insurance, Health Services        | -52.5 (-55.0 to -49.8)                       | p<0.001              | -16.1 (-17.5 to -14.6)                  | p<0.001              | -6.9 (-8.2 to -5.5)                        | p<0.001              |
| Other Products                    | -10.3 (-12.3 to -8.3)                        | p<0.001              | -5.5 (-6.9 to -4.0)                     | p<0.001              | -1.6 (-3.1 to -0.1)                        | p=.035               |

<sup>a</sup> Value expressed as percentage of annual revenue.

<sup>b</sup> Median difference between pharmaceuticals and subsectors of the healthcare database with 95% CI calculated as Hodges-Lehman estimator. This value is calculated as the median of differences between all pairs of observations from the pharmaceuticals and the healthcare subsector indicated.

<sup>d</sup> P value calculated using the non-parametric, Mann-Whitney test. Since 3 different comparisons were performed, significance in this analysis was interpreted with a Bonferroni correction of 3, meaning that  $P<.016$  was considered to be significant.

**eTable 7. Differential profit margins of pharmaceutical and S&P 500 companies, complete results**

|                                                   | Sample Period | N companies | N observations <sup>a</sup> | Reference profit margin (% revenue) <sup>b</sup> |      |         | Differential profit margin of pharmaceutical companies relative to S&P 500 (% revenue) <sup>c</sup> |      |         | Control for company size (market capitalization) (% revenue) <sup>d</sup> |     |         | pseudo R <sup>2</sup> |
|---------------------------------------------------|---------------|-------------|-----------------------------|--------------------------------------------------|------|---------|-----------------------------------------------------------------------------------------------------|------|---------|---------------------------------------------------------------------------|-----|---------|-----------------------|
|                                                   |               |             |                             | Intercept (95% CI)                               | z    | P Value | PHARMA Coefficient (95% CI)                                                                         | z    | P Value | Market Capitalization Coefficient (95% CI)                                | z   | P Value |                       |
| <b>Gross profit margin<sup>j</sup></b>            |               |             |                             |                                                  |      |         |                                                                                                     |      |         |                                                                           |     |         |                       |
| Bivariable <sup>e</sup>                           | 2000-2018     | 392         | 6889                        | 37.4 (35.2 to 39.6)                              | 32.9 | <.001   | 39.1 (32.5 to 45.7)                                                                                 | 11.6 | <.001   | n/a <sup>e</sup>                                                          | n/a | n/a     | 0.06                  |
| Multivariable <sup>f</sup>                        | 2000-2018     | 392         | 6889                        | 32.1 (28.8 to 35.4)                              | 19.2 | <.001   | 34.6 (25.3 to 44.0)                                                                                 | 7.2  | <.001   | 4.9x10 <sup>-5</sup> (-6.8x10 <sup>-7</sup> to 9.9x10 <sup>-5</sup> )     | 1.9 | 0.05    | 0.07                  |
| Multivariable <sup>f</sup> , R&D>0 <sup>g</sup>   | 2000-2018     | 219         | 3553                        | 37.6 (33.1 to 42.0)                              | 16.6 | <.001   | 30.5 (20.9 to 40.1)                                                                                 | 6.2  | <.001   | 4.4x10 <sup>-5</sup> (-4.5x10 <sup>-6</sup> to 9.3x10 <sup>-5</sup> )     | 1.8 | 0.08    | 0.08                  |
| Multivariable <sup>f</sup> , S&P 500 <sup>h</sup> | 2000-2018     | 378         | 5087                        | 30.9 (27.6 to 34.2)                              | 18.3 | <.001   | 37.2 (25.4 to 49.0)                                                                                 | 6.2  | <.001   | 5.0x10 <sup>-7</sup> (-4.2x10 <sup>-8</sup> to 1.0x10 <sup>-6</sup> )     | 1.8 | 0.07    | 0.09                  |
| Multivariable <sup>f,i</sup>                      | 2014-2018     | 392         | 1918                        | 37.5 (35.6 to 39.5)                              | 37.8 | <.001   | 35.8 (28.3 to 43.4)                                                                                 | 9.3  | <.001   | 2.9x10 <sup>-7</sup> (-1.3x10 <sup>-7</sup> to 7x10 <sup>-7</sup> )       | 1.4 | 0.17    | 0.11                  |
| <b>EBITDA margin<sup>j</sup></b>                  |               |             |                             |                                                  |      |         |                                                                                                     |      |         |                                                                           |     |         |                       |
| Bivariable <sup>e</sup>                           | 2000-2018     | 392         | 6889                        | 19.0 (17.8 to 20.3)                              | 30.0 | <.001   | 10.4 (7.1 to 13.7)                                                                                  | 6.2  | <.001   | n/a <sup>e</sup>                                                          | n/a | n/a     | 0.01                  |
| Multivariable <sup>f</sup>                        | 2000-2018     | 392         | 6889                        | 15.9 (14.5 to 17.4)                              | 21.6 | <.001   | 8.6 (4.7 to 12.5)                                                                                   | 4.3  | <.001   | 3.4x10 <sup>-5</sup> (1.1x10 <sup>-5</sup> to 5.7x10 <sup>-5</sup> )      | 2.9 | 0.004   | 0.02                  |
| Multivariable <sup>f</sup> , R&D>0 <sup>g</sup>   | 2000-2018     | 219         | 3553                        | 15.3 (13.7 to 16.9)                              | 18.9 | <.001   | 9.2 (5.2 to 13.2)                                                                                   | 4.5  | <.001   | 3.3x10 <sup>-5</sup> (1.0x10 <sup>-5</sup> to 5.6x10 <sup>-5</sup> )      | 2.8 | 0.005   | 0.04                  |
| Multivariable <sup>f</sup> , S&P50 <sup>h</sup>   | 2000-2018     | 378         | 5087                        | 17.2 (15.4 to 19.0)                              | 19.0 | <0.001  | 11.1 (5.4 to 16.8)                                                                                  | 3.8  | <0.001  | 2.8x10 <sup>-7</sup> (6.9x10 <sup>-8</sup> to 5.0x10 <sup>-7</sup> )      | 2.6 | 0.01    | 0.06                  |
| Multivariable <sup>f,i</sup>                      | 2014-2018     | 392         | 1918                        | 19.7 (18.6 to 20.7)                              | 35.4 | <0.001  | 9.0 (2.9 to 15.1)                                                                                   | 2.9  | 0.004   | 2.3x10 <sup>-7</sup> (3.6x10 <sup>-8</sup> to 4.1x10 <sup>-7</sup> )      | 2.3 | 0.02    | 0.04                  |
| <b>Net income margin<sup>j</sup></b>              |               |             |                             |                                                  |      |         |                                                                                                     |      |         |                                                                           |     |         |                       |
| Bivariable <sup>e</sup>                           | 2000-2018     | 392         | 6889                        | 7.7 (7.2 to 8.2)                                 | 31.2 | <0.001  | 6.1 (2.5 to 9.7)                                                                                    | 3.3  | 0.001   | n/a <sup>e</sup>                                                          | n/a | n/a     | 0.003                 |
| Multivariable <sup>f</sup>                        | 2000-2018     | 392         | 6889                        | 5.4 (4.7 to 6.2)                                 | 14.1 | <0.001  | 4.1 (0.6 to 7.5)                                                                                    | 2.3  | 0.02    | 2.9x10 <sup>-5</sup> (1.2x10 <sup>-5</sup> to 4.7x10 <sup>-5</sup> )      | 3.3 | 0.001   | 0.01                  |
| Multivariable <sup>f</sup> , R&D>0 <sup>g</sup>   | 2000-2018     | 219         | 3553                        | 6.1 (4.9 to 7.3)                                 | 10.0 | <0.001  | 3.6 (1.1x10 <sup>-2</sup> to 7.2)                                                                   | 2.0  | 0.05    | 2.7x10 <sup>-5</sup> (8.4x10 <sup>-6</sup> to 4.6x10 <sup>-5</sup> )      | 2.8 | 0.005   | 0.02                  |
| Multivariable <sup>f</sup> , S&P500 <sup>h</sup>  | 2000-2018     | 378         | 5087                        | 5.9 (5.0 to 6.8)                                 | 12.7 | <0.001  | 6.8 (3.5 to 10.1)                                                                                   | 4.0  | <0.001  | 2.2x10 <sup>-7</sup> (6.5x10 <sup>-8</sup> to 3.8x10 <sup>-7</sup> )      | 2.8 | 0.006   | 0.05                  |
| Multivariable <sup>f,i</sup>                      | 2014-2018     | 392         | 1918                        | 8.0 (7.3 to 8.8)                                 | 19.8 | <0.001  | 2.3 (-1.0 to 5.6)                                                                                   | 1.4  | 0.17    | 2.2x10 <sup>-7</sup> (8.8x10 <sup>-8</sup> to 3.6x10 <sup>-7</sup> )      | 3.2 | 0.001   | 0.02                  |

<sup>a</sup> Each observation represents data from one company for one fiscal year.

<sup>b</sup> The reference profit margin is the intercept of the median regression models. In the bivariable model, the intercept represents the median profit margins of S&P 500 companies. In the multivariable model, the intercept does not represent the median profit margin of S&P 500 companies, but rather the median profit margin of S&P 500 companies when all year indicator variables and the company size variable are set equal to zero.

<sup>c</sup> The differential profit margin of pharmaceutical companies relative to the S&P 500 is the coefficient of the PHARMA indicator variable. The coefficient value represents the differential profit margin for pharmaceutical companies compared to S&P 500 companies (after controlling for size and year in the multivariable model).

<sup>d</sup> The control for company size (market capitalization).

<sup>e</sup> The bivariable median regression model included an indicator variable (PHARMA) set equal to one for pharmaceutical companies. The bivariable model does not include terms for company size (market capitalization) or year (year fixed effects).

<sup>f</sup> The multivariable median regression model included an indicator variable (PHARMA) set equal to one for pharmaceutical companies, a variable to control for company size (market capitalization), and an indicator variable for each year to control for time trends.

<sup>g</sup> Estimates of differential profit by multivariable median regression on data only from fiscal years with non-zero R&D expense. All pharmaceutical companies had non-zero R&D expense for all years in the study. This model compares the profitability of pharmaceutical companies to only those S&P 500 companies with non-zero R&D expense in a given year.

<sup>h</sup> Estimates of differential profit by multivariable median regression on data only from fiscal years during which a company was included in the S&P 500 Index. This excludes data from emerging companies in the years before they were included in the S&P 500 Index.

<sup>i</sup> Estimates of differential profit by multivariable median regression on data only from the past five years (2014-2018).

<sup>j</sup> For definitions of financial metrics, see Box 1 or eAppendix.

**eTable 8. Differential profit margins of pharmaceutical companies and sectors within the S&P 500, complete results<sup>a</sup>**

|                                          | Reference gross profit margin (95% CI) (% revenue) <sup>b</sup>                                | z <sup>e</sup> | P Value <sup>e</sup> | Reference EBITDA margin (95% CI) (% revenue) <sup>b</sup>                                | z <sup>e</sup> | P Value <sup>e</sup> | Reference net income margin (95% CI) (% revenue) <sup>b</sup>                                | z <sup>e</sup> | P Value <sup>e</sup> |
|------------------------------------------|------------------------------------------------------------------------------------------------|----------------|----------------------|------------------------------------------------------------------------------------------|----------------|----------------------|----------------------------------------------------------------------------------------------|----------------|----------------------|
|                                          | 70.3 (61.1 to 79.5)                                                                            | 14.98          | <0.001               | 25.2 (21.3 to 29.2)                                                                      | 12.42          | <0.001               | 10.2 (6.6 to 13.8)                                                                           | 5.49           | <0.001               |
| Sector within S&P 500 <sup>d</sup>       | Differential gross profit margin relative to pharmaceuticals (95% CI) <sup>c</sup> (% revenue) | z              | P <sup>b</sup>       | Differential EBITDA margin relative to pharmaceuticals (95% CI) <sup>c</sup> (% revenue) | z              | P <sup>b</sup>       | Differential net income margin relative to pharmaceuticals (95% CI) <sup>c</sup> (% revenue) | z              | P <sup>b</sup>       |
| Technology                               | -14.4 (-24.0 to -4.9)                                                                          | 2.95           | 0.003                | -3.2 (-7.9 to 1.4)                                                                       | 1.36           | 0.17                 | 0.9 (-2.9 to 4.7)                                                                            | 0.47           | 0.64                 |
| Other <sup>d</sup>                       | -32.2 (-49.3 to -15.1)                                                                         | 3.69           | <0.001               | -1.4 (-7.8 to 5.1)                                                                       | 0.41           | 0.68                 | 0.3 (-4.8 to 5.3)                                                                            | 0.11           | 0.91                 |
| Utilities                                | -45.9 (-54.7 to -37.1)                                                                         | 10.21          | <0.001               | 1.6 (-2.5 to 5.8)                                                                        | 0.78           | 0.44                 | -3.3 (-6.9 to 0.3)                                                                           | 1.81           | 0.07                 |
| Consumer Staples                         | -33.6 (-43.9 to -23.3)                                                                         | 6.38           | <0.001               | -10.1 (-14.9 to -5.2)                                                                    | 4.08           | <0.001               | -3.9 (-7.7 to 0.0)                                                                           | 1.98           | 0.05                 |
| Materials                                | -40.3 (-51.0 to -29.7)                                                                         | 7.42           | <0.001               | -8.5 (-13.5 to -3.6)                                                                     | 3.36           | <0.001               | -4.3 (-8.1 to -0.6)                                                                          | 2.27           | 0.02                 |
| Communications                           | -27.5 (-40.9 to -14.0)                                                                         | 4.01           | <0.001               | -4.2 (-10.5 to 2.0)                                                                      | 1.34           | 0.18                 | -4.6 (-8.1 to -1.0)                                                                          | 2.49           | 0.01                 |
| Industrials                              | -43.7 (-53.0 to -34.4)                                                                         | 9.24           | <0.001               | -12.0 (-16.1 to -7.8)                                                                    | 5.68           | <0.001               | -4.9 (-8.4 to -1.4)                                                                          | 2.77           | 0.006                |
| Consumer Discretionary                   | -39.4 (-49.0 to -29.9)                                                                         | 8.10           | <0.001               | -13.1 (-17.1 to -9.0)                                                                    | 6.28           | <0.001               | -5.4 (-9.0 to -1.8)                                                                          | 2.94           | 0.003                |
| Energy                                   | -40.4 (-54.1 to -26.8)                                                                         | 5.82           | <0.001               | -4.0 (-15.9 to 8.0)                                                                      | 0.65           | 0.51                 | -5.7 (-9.9 to -1.5)                                                                          | 2.65           | 0.008                |
| Health Care                              | -48.3 (-64.5 to -32.0)                                                                         | 5.83           | <0.001               | -12.3 (-18.7 to -5.9)                                                                    | 3.75           | <0.001               | -5.8 (-9.7 to -1.9)                                                                          | 2.92           | 0.004                |
| <b>Market Capitalization<sup>f</sup></b> | 1.8x10 <sup>-5</sup> (2.3x10 <sup>-5</sup> to 6.0x10 <sup>-5</sup> )                           | 0.85           | 0.39                 | 3.1x10 <sup>-5</sup> (6.6x10 <sup>-6</sup> to 5.5x10 <sup>-5</sup> )                     | 2.50           | 0.01                 | 2.5x10 <sup>-5</sup> (8.8x10 <sup>-6</sup> to 4.1x10 <sup>-5</sup> )                         | 3.02           | 0.003                |
| <b>pseudo R<sup>2</sup></b>              | 0.17                                                                                           |                |                      | 0.06                                                                                     |                |                      | 0.02                                                                                         |                |                      |

<sup>a</sup> Differential profit was estimated using the multivariable median regression model including an indicator variable for each sector, a control for company size (market capitalization), and indicator variables for each year (year fixed effects) to control for time trends. Regressions were performed with N=6,889 observations for the years 2000-2018, representing the combined pharmaceutical and S&P 500 datasets. Each observation represents data from one company for one fiscal year. For definitions of profit metrics, see Box 1 or eAppendix.

<sup>b</sup> The reference profit margin is the intercept of the median multivariable regression model. In these multivariable models, the reference profit margin reflects the median profit margin of pharmaceutical companies when all year indicator variables and the company size variable are set equal to zero.

<sup>c</sup> The differential profit margin of companies in each of the S&P 500 sectors relative to pharmaceuticals was estimated as the coefficient on the indicator variable for that sector. This represents the differential profit margin between companies in that sector and pharmaceutical companies after controlling for size and year. Negative values indicate that the profit margins of pharmaceutical companies were larger than those for that sector.

<sup>d</sup> Companies in the S&P 500 dataset were classified by the Bloomberg Industry Classification System. Health Care (other) comprised companies classified as Health Care, but excluding pharmaceutical companies. "Other" comprised primarily companies in the financial services and real estate sectors that were not excluded from the S&P 500 dataset under initial sample criteria. Sectors are ordered by the differential net income margin of the sector relative to Pharmaceuticals.

<sup>e</sup> Since ten different sectors were examined for each model for each primary outcome, significance in this analysis was interpreted with a Bonferroni correction of 10, meaning that  $P < .005$  was considered to be significant. The z values are expressed in absolute values.

<sup>f</sup> The control for company size (market capitalization).



**eFigure 1A–F. Distribution of expense and profit metrics as a fraction of revenue in the pharmaceutical and S&P 500 datasets<sup>a</sup>**

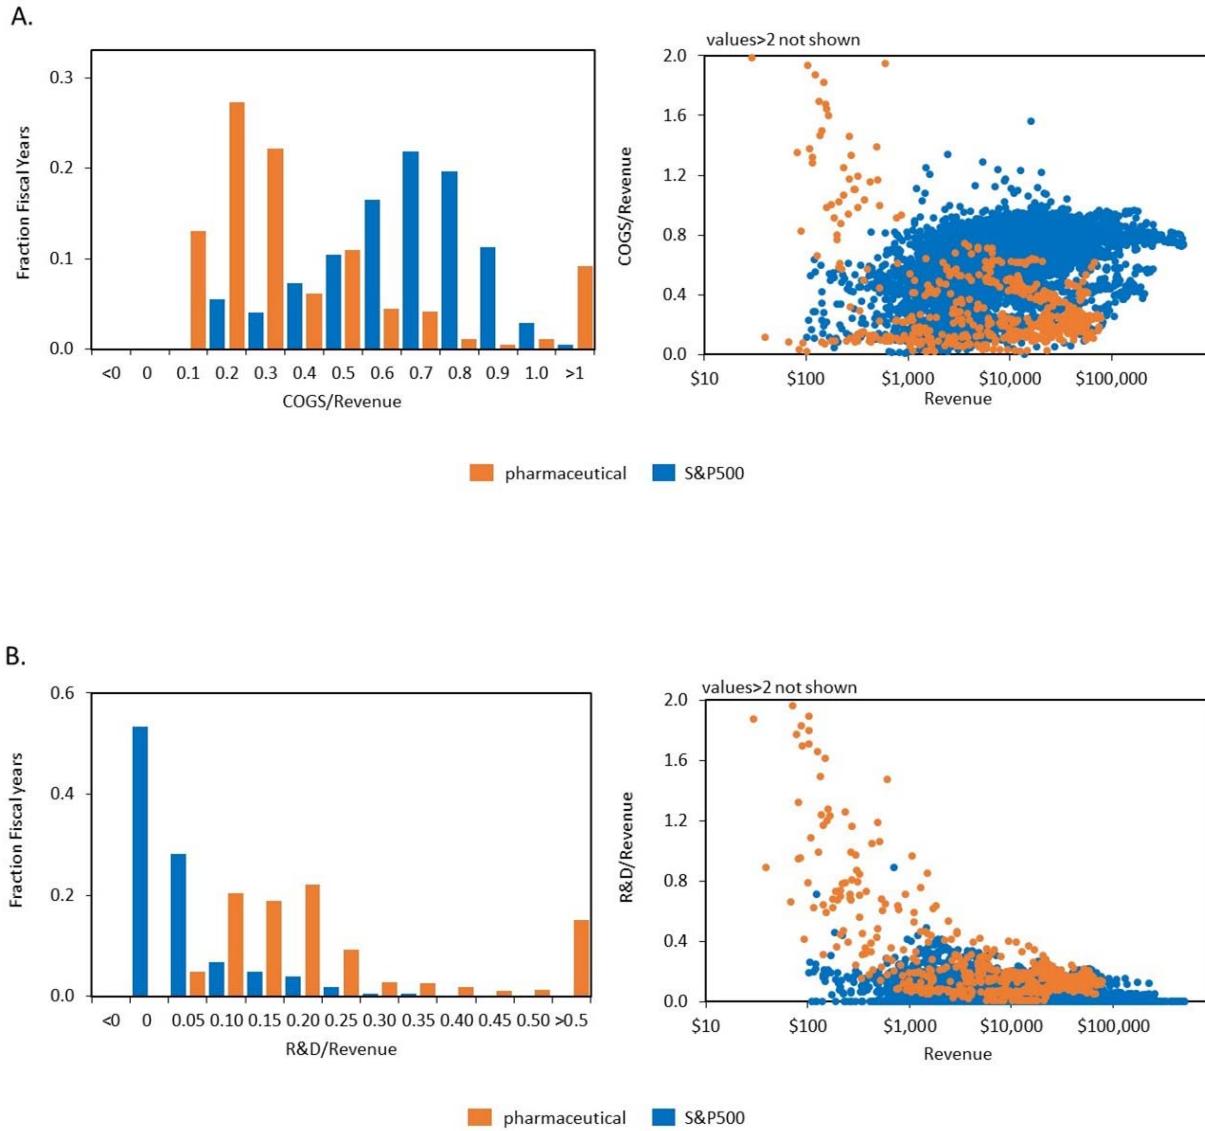

C.

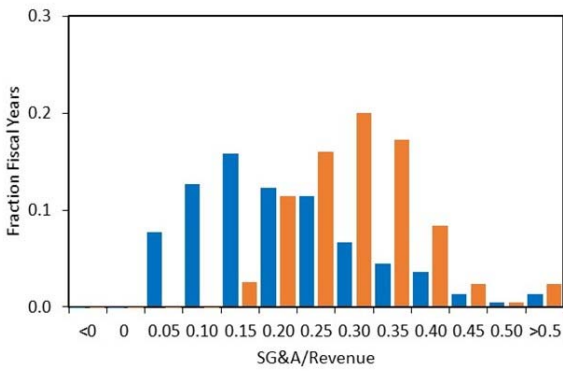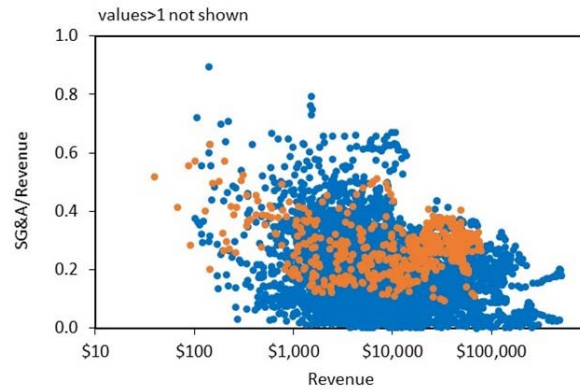

pharmaceutical S&P500

D.

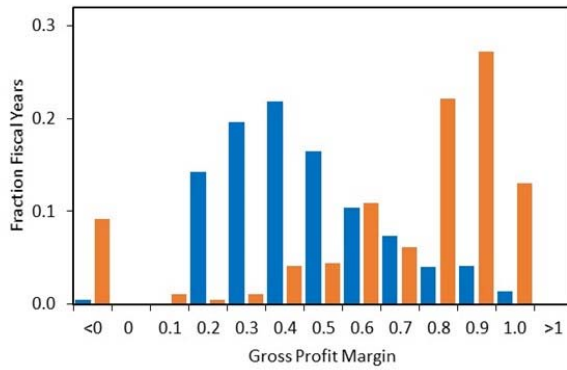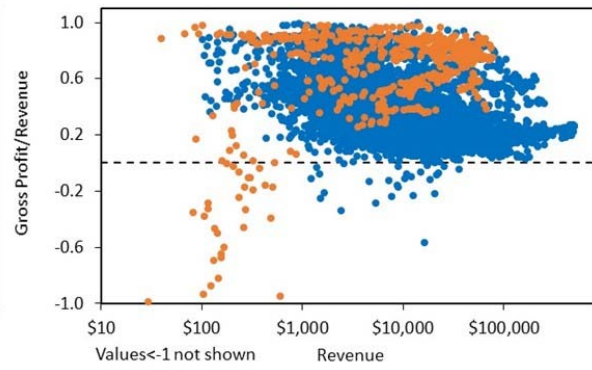

pharmaceutical S&P500

E.

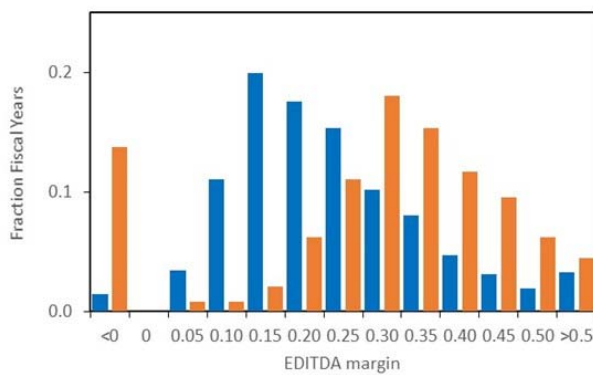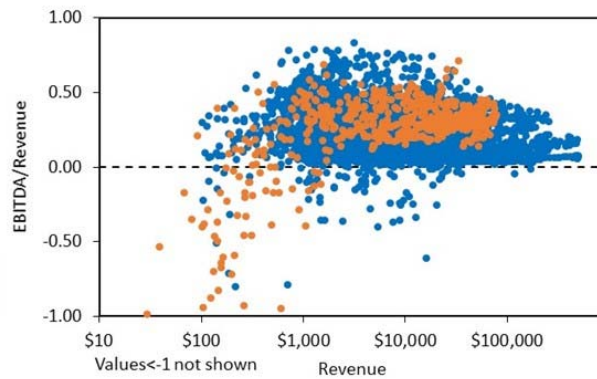

pharmaceutical S&P500

F.

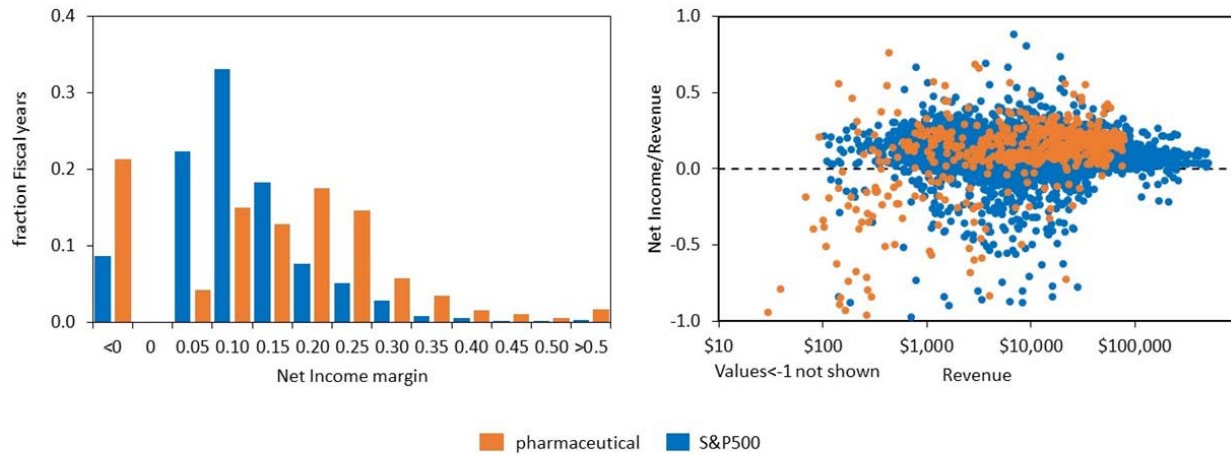

<sup>a</sup>Expenses and profit measures as a fraction of revenues for companies in the pharmaceutical and S&P 500 datasets for each fiscal year from 2000–2018. (A) COGS as a fraction of revenue; (B) R&D expense as a fraction of revenue; (C) SG&A as a fraction of revenue; (D) gross profit as a fraction of revenue (gross profit margin); (E) EBITDA as a fraction of revenue (EBITDA margin); (F) net income as a fraction of revenue (net income margin). Histograms (LEFT) show the distribution of expense and profit metrics for pharmaceutical and S&P 500 companies. Scatter plots (RIGHT) show the relation between the metric and revenue. Each point represents one fiscal year of data for one company. Outlier values are not shown in scatter plots as indicated. All data is in U.S. dollars inflation adjusted to 2016 dollars.

## References

1. FASB Accounting Standards Codification. 730-10-20. Research and Development - Glossary. <https://asc.fasb.org/glossarysection&trid=2127277>
2. FASB Accounting Standards Codification. 730-10-25-2. Elements of Costs to Be Identified with Research and Development Activities. <https://asc.fasb.org/section&trid=2127278>
3. FASB Accounting Standards Codification. 730-10-55-1. Research and Development – Implementation Guidance - Examples of Activities Typically Included in Research and Development. <https://asc.fasb.org/section&trid=2127288>
4. FASB Accounting Standards Codification. 730-10-55-2. Research and Development – Implementation Guidance - Examples of Activities Typically Excluded in Research and Development. <https://asc.fasb.org/section&trid=2127288>
5. FASB Financial Accounting Series. Statement of Financial Accounting Standards No. 141R. Business Combinations. [https://www.fasb.org/jsp/FASB/Document\\_C/DocumentPage?cid=1218220124931&acceptedDisclaimer=true](https://www.fasb.org/jsp/FASB/Document_C/DocumentPage?cid=1218220124931&acceptedDisclaimer=true)
